# Supplementary material for: Improved switching characteristics of p-type tin monoxide field-effect transistors through Schottky energy barrier engineering
Source: Royal Society of Chemistry journal article supplement (doi:10.1039/c9tc04345d), 2019-11-15
Supplement: c9tc04345d1.pdf [file c9tc04345d1.pdf]

## Supplementary Information

### Improved Switching Characteristics of p-Type Tin Monoxide Field-Effect Transistors through Schottky Energy Barrier Engineering

*Taiky Kim,<sup>a</sup> Jeong-Kyu Kim,<sup>b</sup> Baekeun Yoo,<sup>a</sup> Hongwei Xu,<sup>a</sup> Sungyeon Yim,<sup>a</sup> Seung-Hwan Kim,<sup>b</sup>  
Hyun-Yong Yu,<sup>b</sup> and Jae Kyeong Jeong<sup>\*a</sup>*

<sup>a</sup>Department of Electronic Engineering, Hanyang University, Seoul 04763, Korea

<sup>b</sup>School of Electrical Engineering, Korea University, Seoul 02841, Korea

\*Corresponding author (E-mail: [jkjeong1@hanyang.ac.kr](mailto:jkjeong1@hanyang.ac.kr))

## 1. LEAKAGE AND OUTPUT CHARACTERISTICS

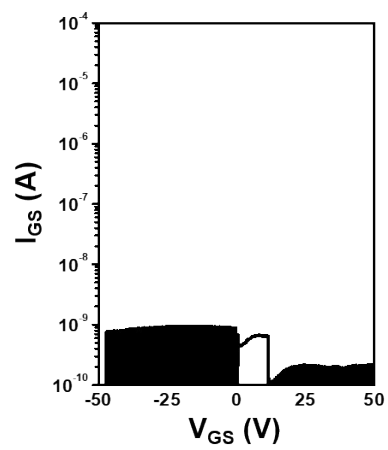

**Figure S1.** Current versus voltage ( $I_{GS}$ - $V_{GS}$ ) characteristics of p-type SnO FET using Pt S/D electrode.

## 2. CONTACT RESISTANCE EXTRACTION BY CTLM METHOD

We extracted the contact resistance ( $R_C$ ) for MS contact and MIS contact with 0.5-nm-thick IL for Au and Pt electrode by using circular transmission line method (CTLM). The geometric of CTLM pattern is depicted in Figure S2. Table S1 summarizes the extracted  $R_C$  values.

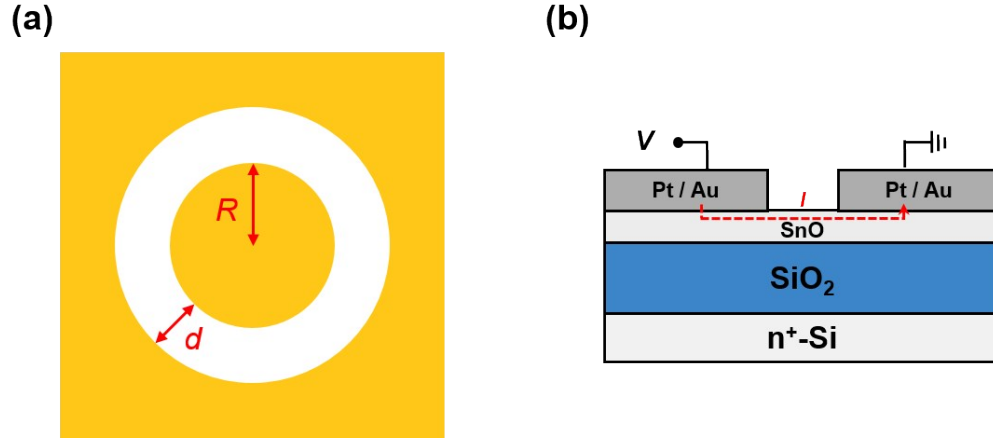

**Figure S2.** (a) Top view of the geometric of circular transmission length method (CTLM) pattern. (b) Cross-sectional diagram of the CTLM device.

**Table S1. Contact and total resistance in the MS and 0.5-nm-thick MIS FETs.**

| Contact type                                  | Pt                  |                     | Au                  |                     |
|-----------------------------------------------|---------------------|---------------------|---------------------|---------------------|
|                                               | $R_C$ (M $\Omega$ ) | $R_T$ (M $\Omega$ ) | $R_C$ (M $\Omega$ ) | $R_T$ (M $\Omega$ ) |
| MS (W/O Al <sub>2</sub> O <sub>3</sub> )      | 0.13                | 1.57                | 0.12                | 1.56                |
| MIS (Al <sub>2</sub> O <sub>3</sub> = 0.5 nm) | 0.47                | 2.26                | 0.66                | 2.61                |

### 3. OUTPUT CHARACTERISTICS AT LOW $V_{DS}$ REGION

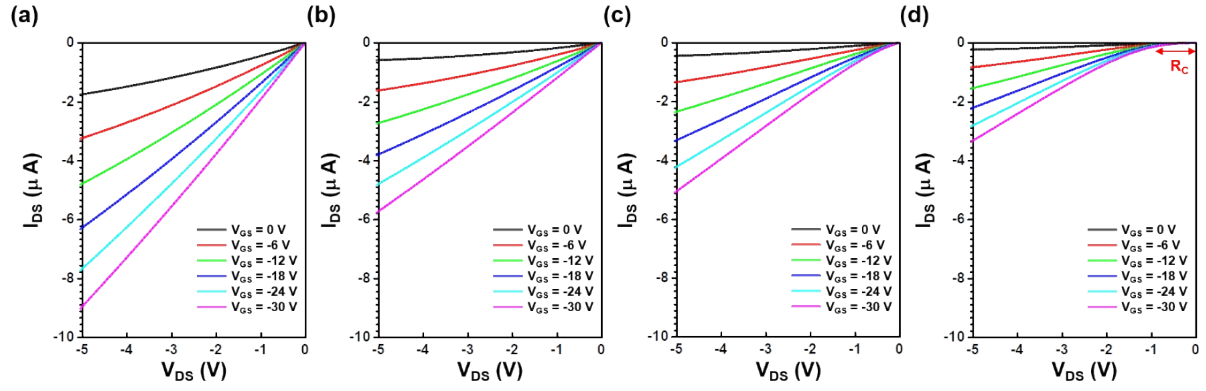

**Figure S3.** Output characteristics of the MIS FET using Pt electrode in the low  $V_{DS}$  region depending on the IL thickness. (a) 0 nm. (b) 0.25 nm. (c) 0.5 nm. (d) 1 nm.

#### 4. BAND DIAGRAMS OF THE MIS CONTACT WITH AND WITHOUT VBO

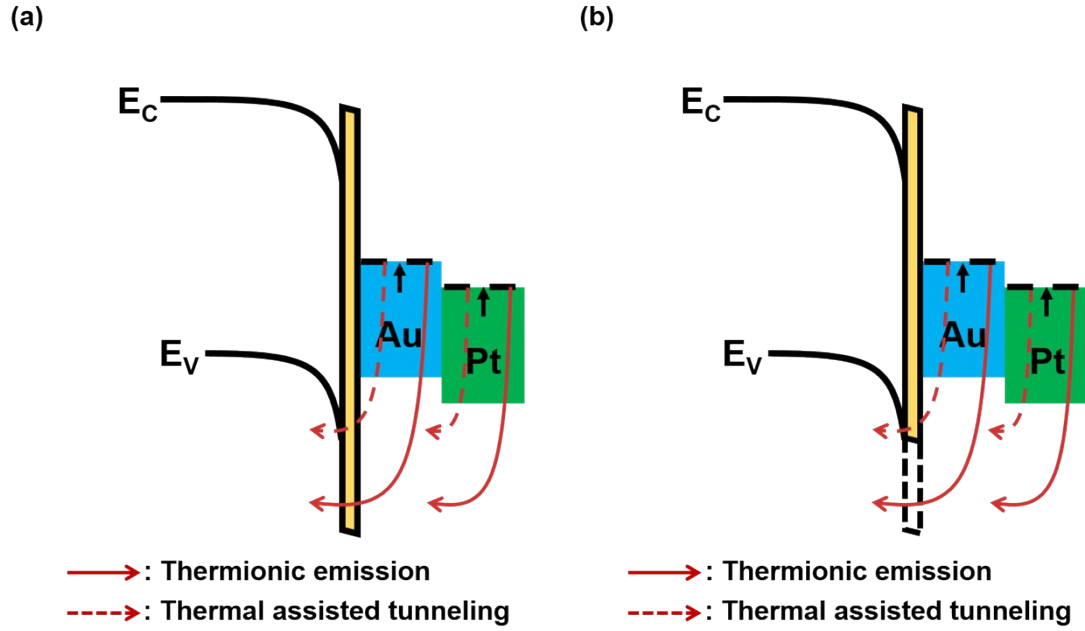

**Figure S4.** Band diagram of the MIS contact (a) with high VBO, and (b) without VBO.

As shown in Figure S3a, the thermionic emission current can be blocked by the interlayer (IL) in MIS contact with high VBO. This interruption from VBO can be surmounted by using IL with zero VBO as shown in Figure S3b. Moreover, the thermal assisted tunneling current can be increased by using IL with zero VBO, because the IL tunneling probability ( $T_{IL}$ ) increases with the decrease of VBO by the following formula:

$$T_{IL} = \exp \left[ -2d_{IL} \frac{(2qm_h^* T_{offset})^{\frac{1}{2}}}{\hbar} \right] \quad (S1)$$

where  $d_{IL}$  is the thickness of the IL,  $m_h^*$  is the hole effective mass,  $\hbar$  is the Dirac's constant, and  $T_{offset}$  is the value of the VBO. Therefore, we can predict that on-current of MIS contact will be enhanced by the adoption of low VBO IL, which induces Fermi-level unpinning without the formation of large tunneling barrier offset.

## 5. LINEAR RELATION BETWEEN $V_{GS}$ AND $\phi_B$

The physical origin of the linear relationship between  $V_{GS}$  and  $\phi_B$  can be understood mathematically. The subthreshold  $I_D$  in the gate voltage region of  $V_{GS} > V_{FB}$  can be described by the following Eq. (S2):

$$I_D \approx \exp\left(-\frac{q(V_{GS} - V_{TH})}{C_r k_B T}\right), C_r = \left[1 + \frac{C_d + C_{it}}{C_i}\right] \quad (S2)$$

where  $C_i$  is the dielectric capacitance per unit area,  $C_d$  is the depletion capacitance in the channel, and  $C_{it}$  is the fast interface state capacitance. Combining the Eq. 3 (in manuscript) and Eq. S2, the following Eq. S3 is given:

$$-A * T^2 \exp\left(-\frac{q\phi_B}{k_B T}\right) \approx \exp\left(-\frac{q(V_{GS} - V_{TH})}{C_r k_B T}\right) \quad (S3)$$

Taking a log function on both sides of the Eq. S3, it can be shown that the  $\phi_B$  increases linearly with the  $V_{GS}$  in this subthreshold region where  $V_{GS} > V_{FB}$ .

## 6. EXTRACTION METHOD OF S PARAMETER

SBH of MS contact with no charge transfer between metal and semiconductor interface, i.e., ideal contact formation without FLP, can be easily calculated by the well-known equation:

$$\phi_B = (\phi_m - \chi) \quad (\text{S4})$$

where  $\phi_B$  is the SBH,  $\phi_m$  is the work-function of metal, and  $\chi$  is the electron affinity of semiconductor. However, there are some charge transfer between metal and semiconductor interface states and thus, an interface dipole with atomic-scaled thickness is created. This charge transfer modifies SBH of MS contact as follows:<sup>1</sup>

$$\phi_B = S(\phi_m - \phi_{CNL}) + (\phi_{CNL} - \chi) \quad (\text{S5})$$

Here,  $\phi_{CNL}$  is the charge neutrality level (CNL) of interface states, which physically means the branch point where the density of donor-like states and that of acceptor-like states are same. S is the pinning factor which is given by<sup>1</sup>

$$S = \frac{1}{1 + (q^2 D_{it} \delta) / \epsilon_\delta} \quad (\text{S6})$$

where  $q$  is electronic charge,  $D_{it}$  is the density of interface states,  $\delta$  and  $\epsilon_\delta$  are the dipole thickness at interface and the permittivity of it. The S parameter becomes close to zero as  $D_{it}$  increases and the Fermi-level at thermal equilibrium condition becomes close to the CNL regardless of metal work function. As shown in **Eq. S5**, this S parameter is the slope parameter of SBH as a function of metal work function. Hence, we can estimate the S parameters for MS and MIS contacts (IL thickness = 0.25 nm, 0.5 nm) by using the extracted SBH values for both Au and Pt metal electrodes, as given by

$$S = \frac{d\phi_B}{d\phi_m} \cong \frac{\phi_{B,Pt} - \phi_{B,Au}}{\phi_{m,Pt} - \phi_{m,Au}} \quad (\text{S7})$$

## REFERENCE

- [1] J. Robertson, *J. Vac. Sci. Technol.*, 2000, 18, 1785.
